# Supplementary material for: Screening of Rosemary Essential Oils with Different Phytochemicals for Antioxidant Capacity, Keratinocyte Cytotoxicity, and Anti-Proliferative Activity
Source: MDPI journal article supplement (doi:10.3390/molecules28020586), 2023-01-06
Supplement: s1 [file s1]

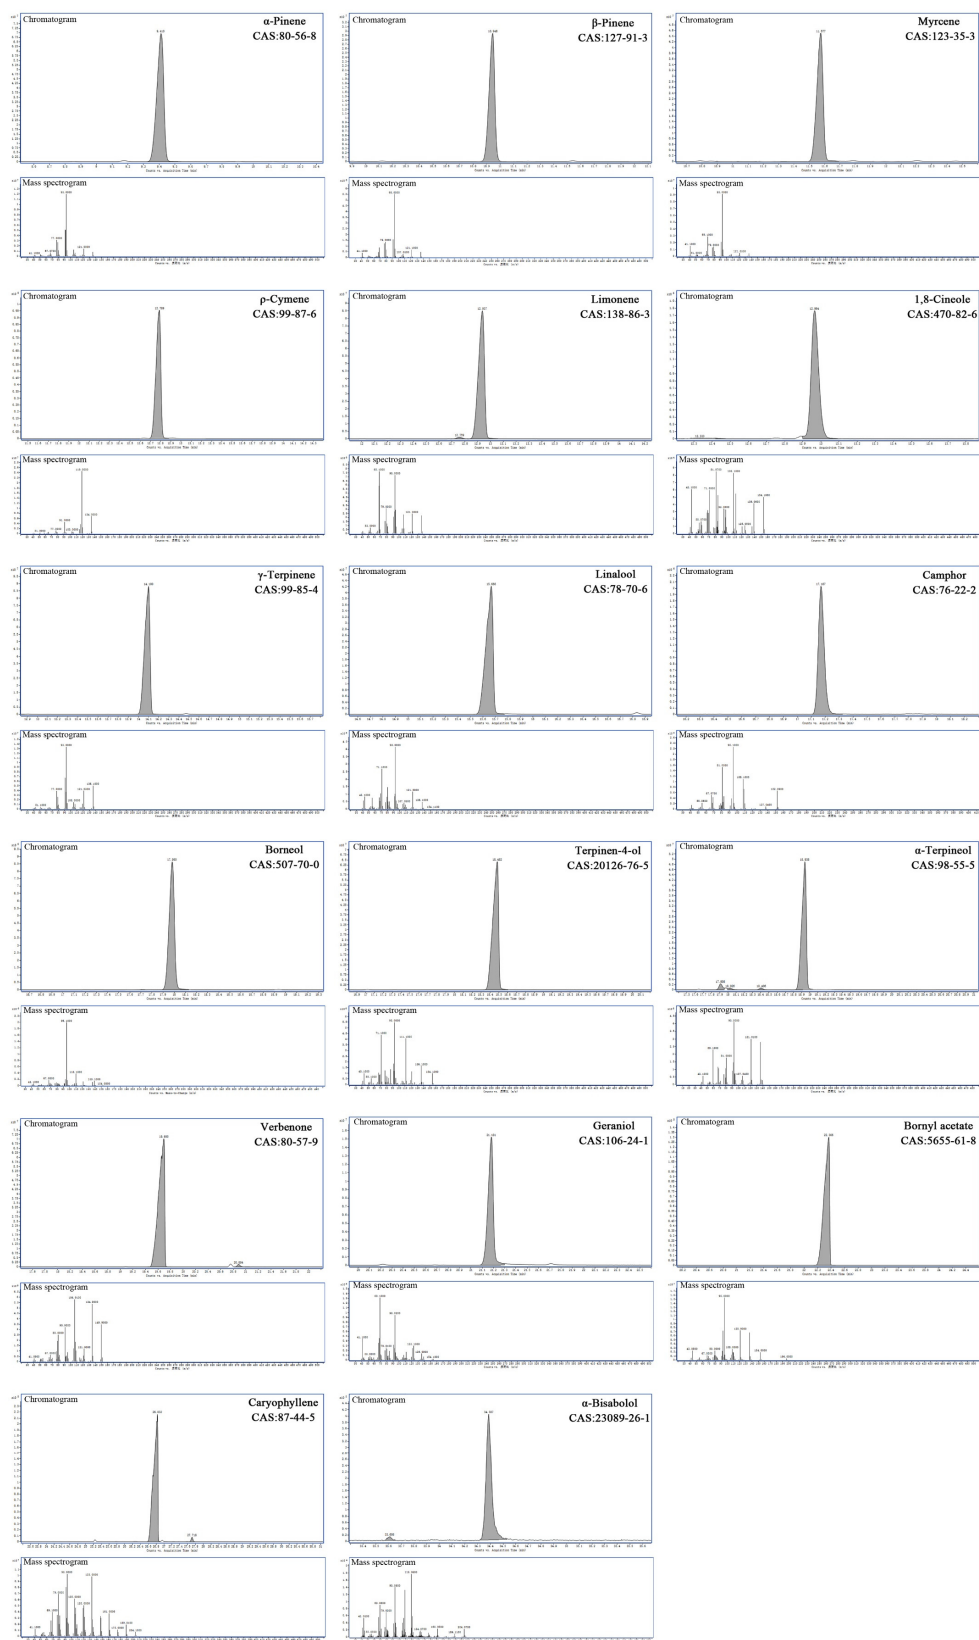

**Figure S1.** The compounds of rosemary essential oils identified by comparison with authentic components
